# Supplementary material
Source: publisher site journal article supplement (https://www.spandidos-publications.com/522/downloadSupplementary)

Figure S1. Effect of GEP on the activity of AKP in microbial strains. The effect of GEP treatment at 1X MIC on the activity of AKP in (A) *Candida albicans*, (B) *Escherichia coli*, (C) *Staphylococcus aureus* and (D) *Pseudomonas aeruginosa*. Data are presented as the mean  $\pm$  SD; n=3; \*\*\*P<0.001 vs. untreated group. AKP, alkaline phosphatase GEP, polypeptide-enriched *Gastrodia elata* extracts; MIC, minimum inhibitory concentration; OD, optical density.

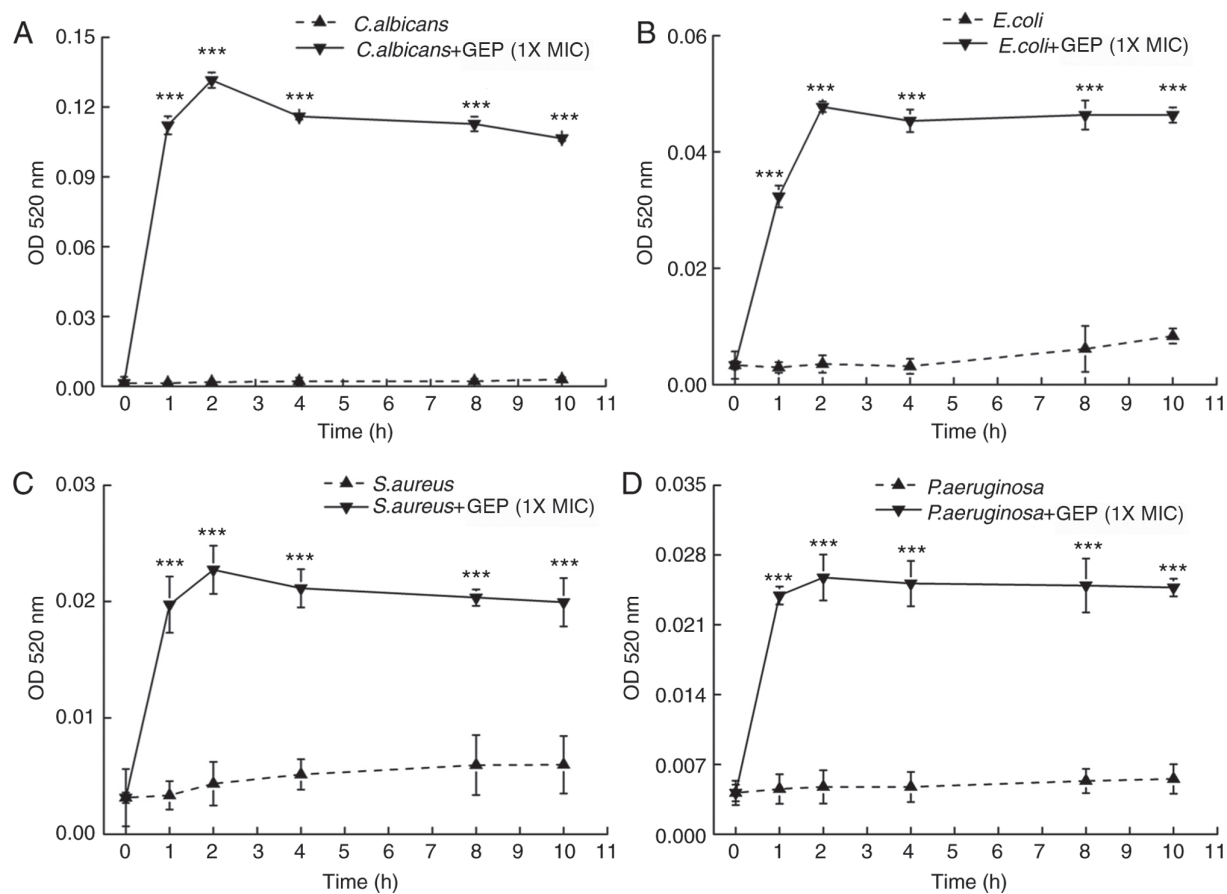

Figure S2. Effect of GEP on the activity of  $\beta$ -galactosidase in microbial strains. The effects of GEP at 1X MIC on the activity of extracellular  $\beta$ -galactosidase in (A) *Candida albicans*, (B) *Escherichia coli*, (C) *Staphylococcus aureus* and (D) *Pseudomonas aeruginosa*. Data are presented as the mean  $\pm$  SD; n=3; \*P<0.05, \*\*P<0.01 and \*\*\*P<0.001 vs. untreated group. GEP, polypeptide-enriched *Gastrodia elata* extracts; MIC, minimum inhibitory concentration.

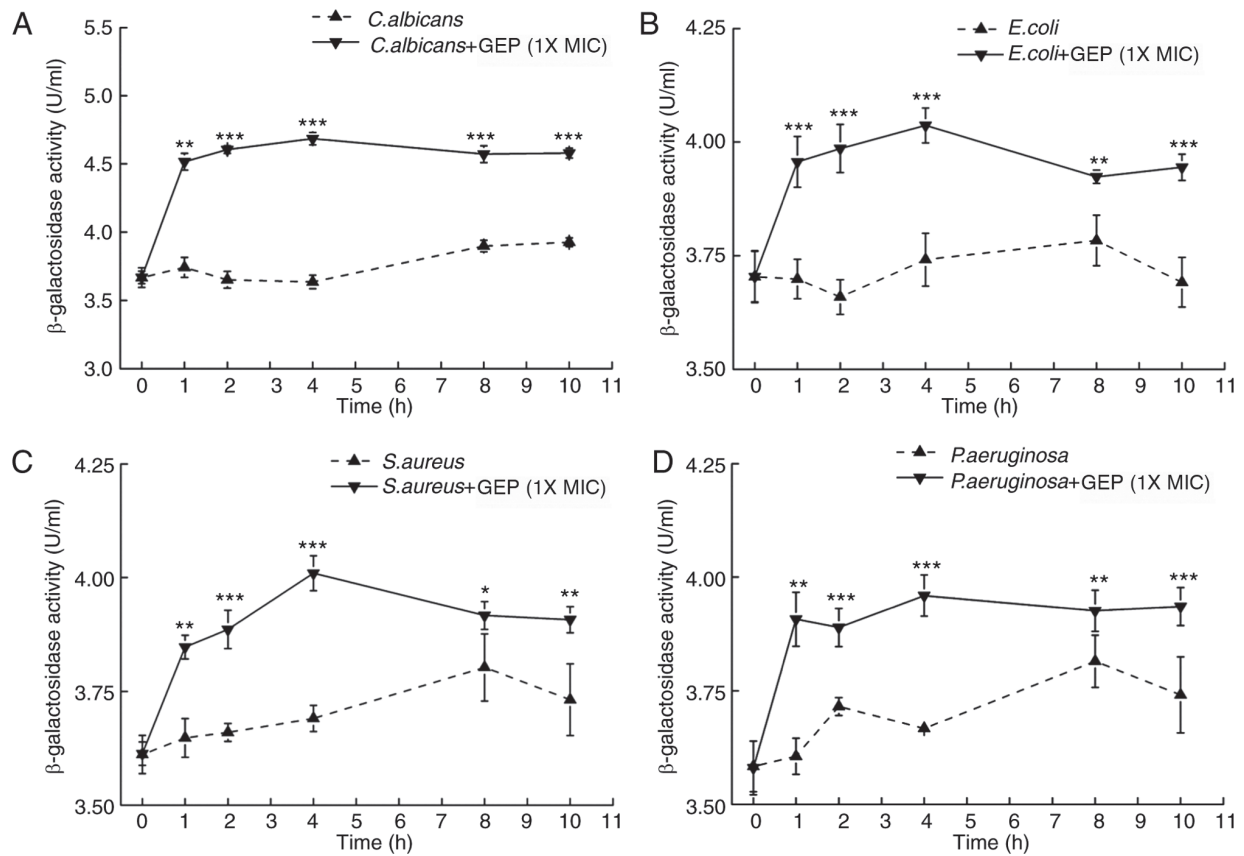

Supplement: Supplementary file 1 [file downloadSupplementary]
